# Supplementary material
Source: PubMed Central journal article supplement (PMC6641688)
Supplement: ao7b00893_si_001.pdf [file ao7b00893_si_001.pdf]

**AMBIENT PRESSURE HYBRID SILICA MONOLITHS WITH  
HEXAMETHYLDISILAZANE: FROM VITREOUS HYDROPHILIC  
XEROGELS TO SUPERHYDROPHOBIC AEROGELS**

Maria de Fátima Júlio<sup>(1)</sup> and Laura M. Ilharco<sup>(1)\*</sup>

*<sup>(1)</sup>Centro de Química-Física Molecular and Institute of Nanoscience and  
Nanotechnology, Instituto Superior Técnico, Universidade de Lisboa, Av. Rovisco Pais  
1, 1049-001 Lisboa, Portugal*

**ELECTRONIC SUPPORTING INFORMATION**

---

\*To whom the correspondence should be addressed.

**E-mail:** [lilharco@tecnico.ulisboa.pt](mailto:lilharco@tecnico.ulisboa.pt)

**Deconvolution of the DRIFT spectra in the 700-1300 cm<sup>-1</sup> region**

The spectral deconvolutions were performed by a non-linear least squares fitting method, using the peak fitting module of OriginPro 7.0. Gaussian band profiles were assumed for all the components, except those related to methyl groups that were considered Lorentzian. No baseline corrections were made and no restrictions were imposed on the band positions and widths. The band positions were confirmed by the second derivative of the spectra. The best fits were obtained with  $\chi^2 \approx 10^{-6}$  and correlation coefficient of 0.999.

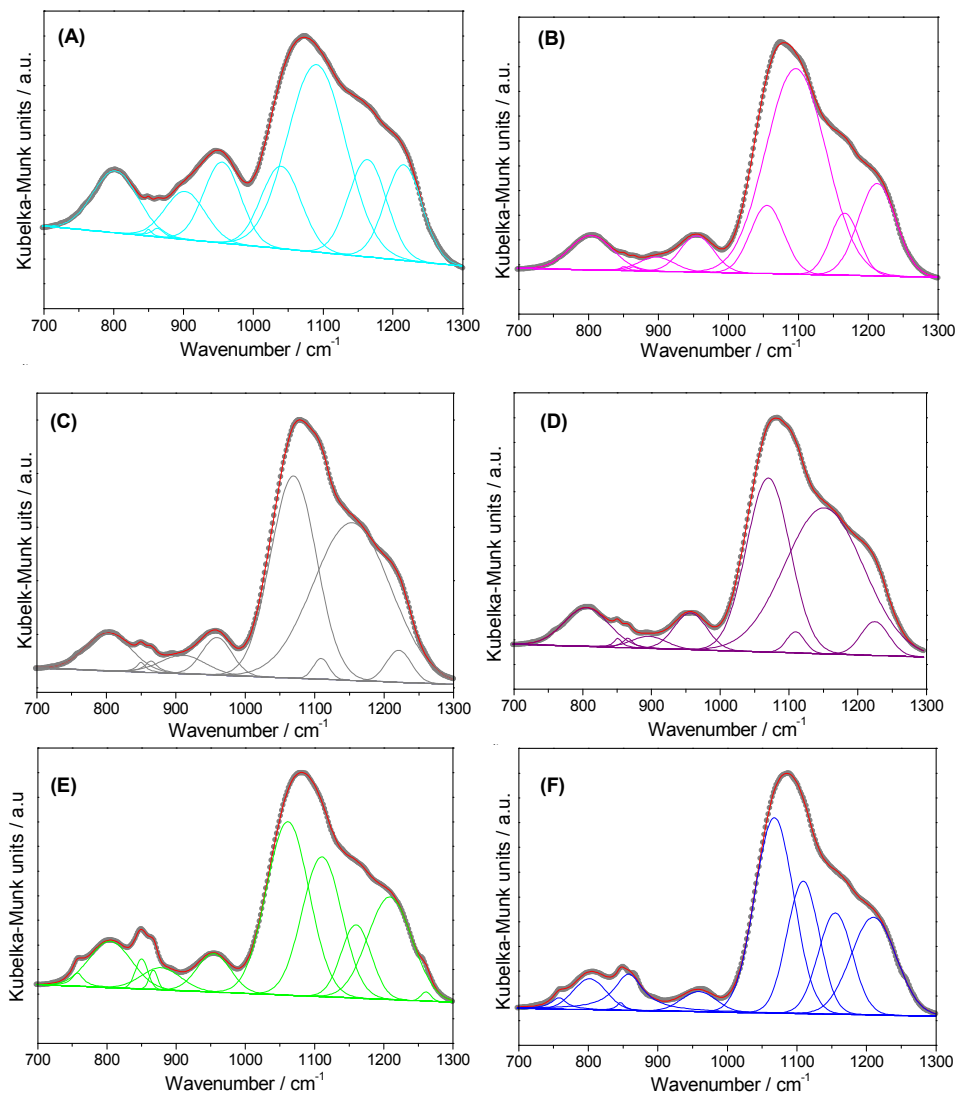

**Figure S1.** Deconvolution of the infrared spectra in the 700-1300 cm<sup>-1</sup> region for samples A<sub>0.011</sub> (A), A'<sub>0.011</sub> (B), A<sub>0.021</sub> (C), A'<sub>0.021</sub> (D), A<sub>0.054</sub> (E) and A'<sub>0.054</sub> (F).

**Table S1.** Components obtained by deconvolution of the spectral region between 700 and 1300  $\text{cm}^{-1}$  for the series  $A_a$  and  $A'_a$ .

| Sample                                     | $\tilde{\nu} / \text{cm}^{-1}$ | Assignments                                          |
|--------------------------------------------|--------------------------------|--------------------------------|--------------------------------|--------------------------------|--------------------------------|--------------------------------|------------------------------------------------------|
|                                            | (Area /%)                      |                                                      |
|                                            | $A_{0.011}$                    | $A_{0.021}$                    | $A_{0.054}$                    | $A'_{0.011}$                   | $A'_{0.021}$                   | $A'_{0.054}$                   |                                                      |
| Series<br>$A_a$ and $A'_a$                 | -                              | -                              | 757<br>(0.87)                  | -                              | -                              | 757<br>(1.06)                  | $\rho\text{CH}_3$                                    |
|                                            | 802<br>(9.54)                  | 802<br>(6.37)                  | 804<br>(7.99)                  | 803<br>(6.34)                  | 805<br>(7.21)                  | 802<br>(4.38)                  | $\nu_s\text{Si-O-Si}$                                |
|                                            | 849<br>(0.20)                  | 849<br>(0.47)                  | 849<br>(1.54)                  | 850<br>(0.19)                  | 850<br>(0.46)                  | 846<br>(0.38)                  | $\gamma\text{CH}_3$                                  |
|                                            | 862<br>(0.49)                  | 864<br>(0.78)                  | 867<br>(0.67)                  | 864<br>(0.23)                  | 865<br>(0.59)                  | 858<br>(6.38)                  | $\gamma\text{CH}_3$                                  |
|                                            | 902<br>(6.57)                  | 910<br>(3.15)                  | 878<br>(3.51)                  | 897<br>(2.14)                  | 896<br>(1.74)                  | 959<br>(2.99)                  | $\nu\text{Si-O}^-$                                   |
|                                            | 955<br>(10.17)                 | 959<br>(4.24)                  | 954<br>(5.22)                  | 954<br>(5.22)                  | 956<br>(4.99)                  | -                              | $\nu\text{Si-O(H)}$                                  |
|                                            | 1039<br>(11.13)                | 1069<br>(35.01)                | 1061<br>(30.08)                | 1055<br>(9.83)                 | 1069<br>(31.70)                | 1067<br>(32.77)                | $\nu_{as}\text{Si-O-Si}$<br>[TO (SiO) <sub>6</sub> ] |
|                                            | 1090<br>(37.17)                | 1109<br>(1.24)                 | 1110<br>(22.45)                | 1096<br>(53.34)                | 1109<br>(1.62)                 | 1108<br>(18.35)                | $\nu_{as}\text{Si-O-Si}$<br>[TO (SiO) <sub>4</sub> ] |
|                                            | 1163<br>(12.67)                | 1153<br>(45.68)                | 1160<br>(8.92)                 | 1166<br>(7.68)                 | 1151<br>(47.70)                | 1155<br>(14.74)                | $\nu_{as}\text{Si-O-Si}$<br>[LO (SiO) <sub>4</sub> ] |
|                                            | 1215<br>(12.05)                | 1221<br>(3.03)                 | 1208<br>(18.38)                | 1212<br>(15.01)                | 1224<br>(3.96)                 | 1210<br>(18.94)                | $\nu_{as}\text{Si-O-Si}$<br>[LO (SiO) <sub>6</sub> ] |
|                                            | -                              | -                              | 1261<br>(0.37)                 | -                              | -                              | -                              | $\delta\text{CH}_3$                                  |
| <b>A[<math>\nu\text{Si-OH}</math>]</b>     | 16.75                          | 7.39                           | 8.73                           | 7.36                           | 6.74                           | 2.99                           |                                                      |
| <b>A[<math>\text{CH}_3</math>-related]</b> | 0.69                           | 1.26                           | 3.44                           | 0.42                           | 1.05                           | 7.8                            |                                                      |

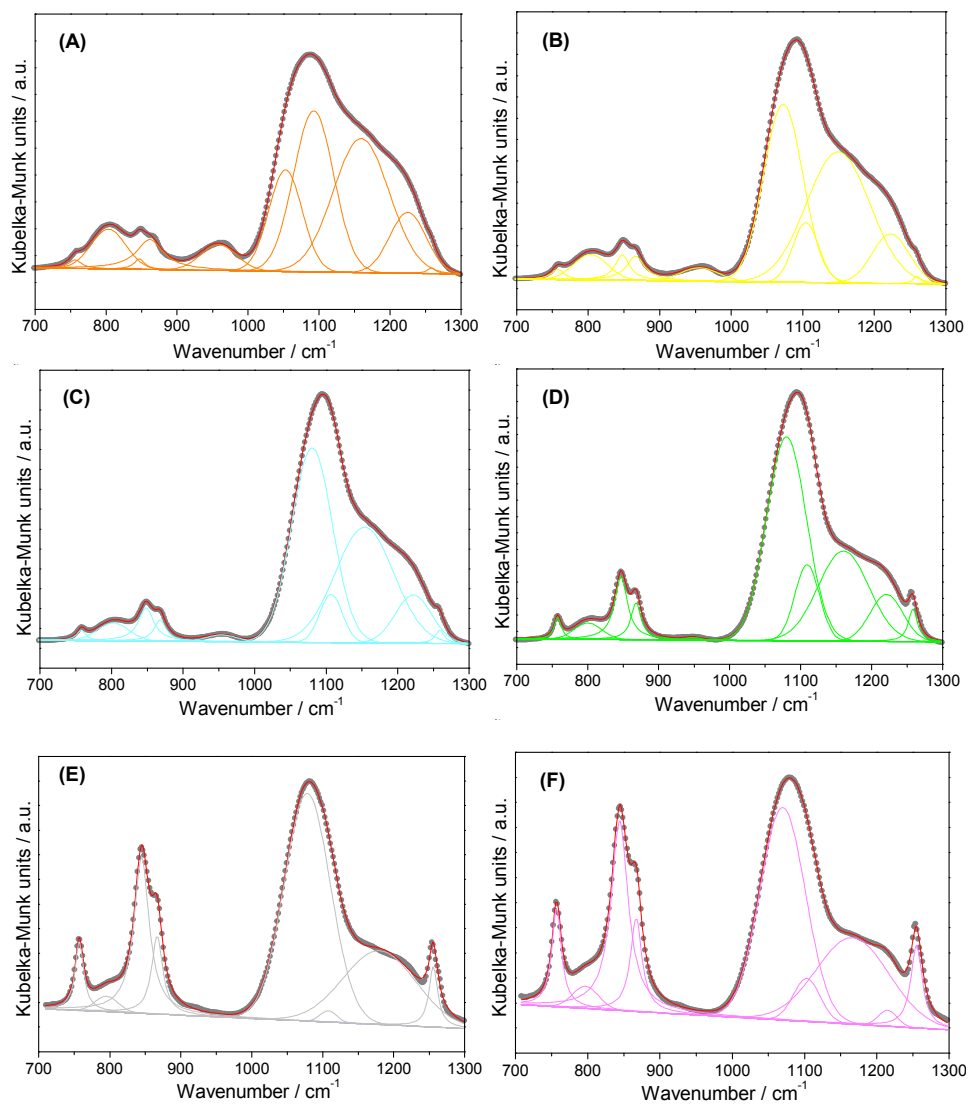

**Figure S2.** Deconvolution of the infrared spectra in the 700-1300  $\text{cm}^{-1}$  region for samples  $\text{B}_{0.021}\text{-t}_\infty$  (A),  $\text{B}_{0.054}\text{-t}_\infty$  (B),  $\text{B}_{0.107}\text{-t}_\infty$  (C),  $\text{B}_{0.214}\text{-t}_\infty$  (D),  $\text{B}_{0.428}\text{-t}_\infty$  (E) and  $\text{B}_{0.857}\text{-t}_\infty$  (F).

**Table S2.** Components obtained by deconvolution of the spectral region between 700 and 1300  $\text{cm}^{-1}$  for the series  $B_b\text{-}t_\infty$ .

| Sample                                                       | $\tilde{\nu} / \text{cm}^{-1}$ | Assignments                                          |
|--------------------------------------------------------------|--------------------------------|--------------------------------|--------------------------------|--------------------------------|--------------------------------|--------------------------------|------------------------------------------------------|
|                                                              | (Area %)                       |                                                      |
| Series<br>$B_b\text{-}t_\infty$                              | $B_{0.021\text{-}t_\infty}$    | $B_{0.054\text{-}t_\infty}$    | $B_{0.107\text{-}t_\infty}$    | $B_{0.214\text{-}t_\infty}$    | $B_{0.428\text{-}t_\infty}$    | $B_{0.857\text{-}t_\infty}$    |                                                      |
|                                                              | 756<br>(0.65)                  | 757<br>(0.87)                  | 757<br>(0.69)                  | 757<br>(1.85)                  | 757<br>(3.95)                  | 756<br>(4.86)                  | $\rho\text{CH}_3$                                    |
|                                                              | 803<br>(5.88)                  | 803<br>(4.03)                  | 802<br>(2.85)                  | 800<br>(2.36)                  | 795<br>(3.18)                  | 796<br>(2.07)                  | $\nu_s\text{Si-O-Si}$                                |
|                                                              | 846<br>(0.68)                  | 847<br>(2.51)                  | 848<br>(3.76)                  | 846<br>(6.29)                  | 844<br>(13.03)                 | 844<br>(17.15)                 | $\gamma\text{CH}_3$                                  |
|                                                              | 861<br>(4.95)                  | 866<br>(2.98)                  | 868<br>(1.92)                  | 868<br>(2.95)                  | 866<br>(5.80)                  | 867<br>(5.88)                  | $\gamma\text{CH}_3$                                  |
|                                                              | 958<br>(3.96)                  | 956<br>(2.36)                  | 954<br>(1.04)                  | 949<br>(0.21)                  | 949<br>(0.33)                  | -                              | $\nu\text{Si-O(H)}$                                  |
|                                                              | 1052<br>(14.46)                | 1072<br>(32.45)                | 1080<br>(40.26)                | 1080<br>(42.79)                | 1076<br>(42.37)                | 1069<br>(42.19)                | $\nu_{as}\text{Si-O-Si}$<br>[TO (SiO) <sub>6</sub> ] |
|                                                              | 1092<br>(27.64)                | 1104<br>(7.22)                 | 1106<br>(5.58)                 | 1109<br>(9.86)                 | 1107<br>(1.83)                 | 1103<br>(1.75)                 | $\nu_{as}\text{Si-O-Si}$<br>[TO (SiO) <sub>4</sub> ] |
|                                                              | 1159<br>(32.02)                | 1149<br>(38.68)                | 1153<br>(34.19)                | 1160<br>(24.07)                | 1167<br>(22.89)                | 1166<br>(21.18)                | $\nu_{as}\text{Si-O-Si}$<br>[LO (SiO) <sub>4</sub> ] |
|                                                              | 1225<br>(9.46)                 | 1222<br>(8.52)                 | 1222<br>(8.85)                 | 1221<br>(8.09)                 | 1218<br>(1.82)                 | 1215<br>(1.11)                 | $\nu_{as}\text{Si-O-Si}$<br>[LO (SiO) <sub>6</sub> ] |
| 1258<br>(0.29)                                               | 1259<br>(0.38)                 | 1258<br>(0.86)                 | 1258<br>(2.19)                 | 1255<br>(4.78)                 | 1255<br>(3.82)                 | $\delta\text{CH}_3$            |                                                      |
| <b>A<sub>[<math>\nu\text{Si-OH}</math>]</sub></b>            | 3.96                           | 2.36                           | 1.04                           | 0.21                           | 0.33                           | -                              |                                                      |
| <b>A<sub>[<math>\text{CH}_3\text{-related}</math>]</sub></b> | 6.27                           | 6.35                           | 6.37                           | 11.09                          | 22.78                          | 27.9                           |                                                      |

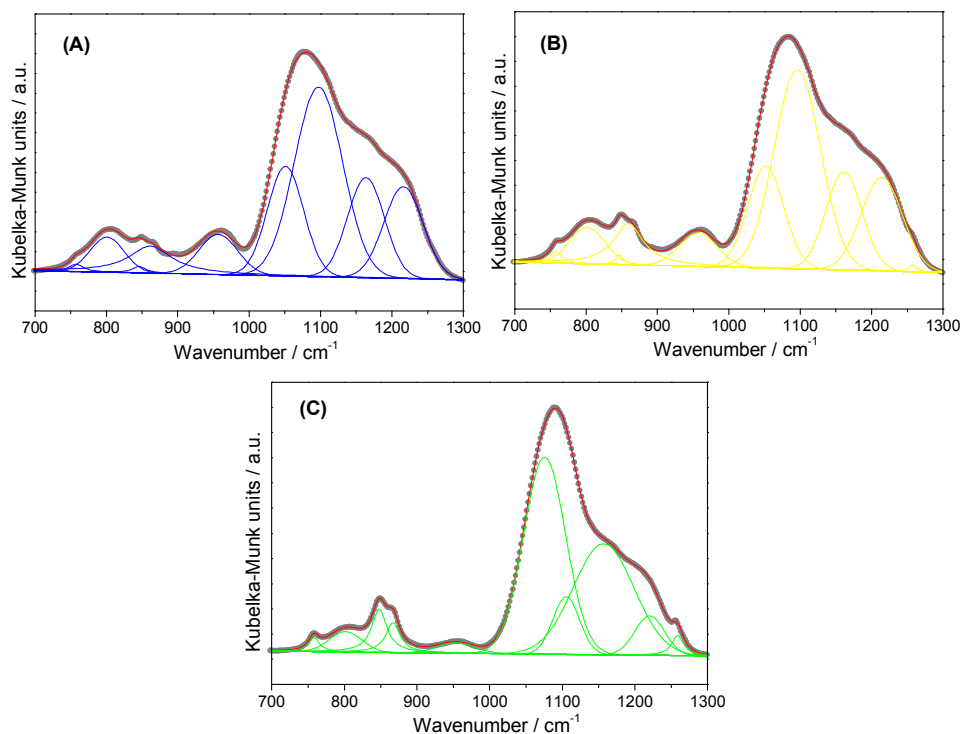

**Figure S3.** Deconvolution of the infrared spectra in the 700-1300  $\text{cm}^{-1}$  region for samples  $A_{0.0055}\text{-}B_{0.0055}\text{-}t_{\infty}$  (A),  $A_{0.0105}\text{-}B_{0.0105}\text{-}t_{\infty}$  (B) and  $A_{0.027}\text{-}B_{0.027}\text{-}t_{\infty}$  (C).

**Table S3.** Components obtained by deconvolution of the spectral region between 700 and 1300  $\text{cm}^{-1}$  for the series  $A_a\text{-}B_b\text{-}t_{\infty}$ .

| Sample                                            | $\tilde{\nu} / \text{cm}^{-1}$                   | $\tilde{\nu} / \text{cm}^{-1}$                   | $\tilde{\nu} / \text{cm}^{-1}$                 | Assignments                                          |
|---------------------------------------------------|--------------------------------------------------|--------------------------------------------------|------------------------------------------------|------------------------------------------------------|
|                                                   | (Area /%)                                        | (Area /%)                                        | (Area /%)                                      |                                                      |
| Series<br>$A_a\text{-}B_b\text{-}t_{\infty}$      | $A_{0.0055}\text{-}B_{0.0055}\text{-}t_{\infty}$ | $A_{0.0105}\text{-}B_{0.0105}\text{-}t_{\infty}$ | $A_{0.027}\text{-}B_{0.027}\text{-}t_{\infty}$ |                                                      |
|                                                   | 757<br>(0.59)                                    | 757<br>(0.82)                                    | 757<br>(1.08)                                  | $\rho\text{CH}_3$                                    |
|                                                   | 801<br>(4.79)                                    | 801<br>(5.13)                                    | 801<br>(3.15)                                  | $\nu_s\text{Si-O-Si}$                                |
|                                                   | 846<br>(0.51)                                    | 847<br>(0.44)                                    | 847<br>(4.59)                                  | $\gamma\text{CH}_3$                                  |
|                                                   | 861<br>(6.36)                                    | 859<br>(6.93)                                    | 866<br>(3.00)                                  | $\gamma\text{CH}_3$                                  |
|                                                   | 956<br>(6.21)                                    | 957<br>(5.11)                                    | 954<br>(1.86)                                  | $\nu\text{Si-O(H)}$                                  |
|                                                   | 1051<br>(15.84)                                  | 1051<br>(14.68)                                  | 1075<br>(39.65)                                | $\nu_{as}\text{Si-O-Si}$<br>[TO (SiO) <sub>6</sub> ] |
|                                                   | 1097<br>(36.61)                                  | 1095<br>(36.92)                                  | 1106<br>(7.33)                                 | $\nu_{as}\text{Si-O-Si}$<br>[TO (SiO) <sub>4</sub> ] |
|                                                   | 1163<br>(14.75)                                  | 1161<br>(14.22)                                  | 1156<br>(32.11)                                | $\nu_{as}\text{Si-O-Si}$<br>[LO (SiO) <sub>4</sub> ] |
|                                                   | 1216<br>(14.34)                                  | 1214<br>(15.47)                                  | 1220<br>(5.62)                                 | $\nu_{as}\text{Si-O-Si}$<br>[LO (SiO) <sub>6</sub> ] |
| -                                                 | 1257<br>(0.27)                                   | 1259<br>(1.59)                                   | $\delta\text{CH}_3$                            |                                                      |
| <b>A[<math>\nu\text{Si-OH}</math>]</b>            | 6.21                                             | 5.11                                             | 1.85                                           |                                                      |
| <b>A[<math>\text{CH}_3\text{-related}</math>]</b> | 7.46                                             | 8.20                                             | 8.68                                           |                                                      |

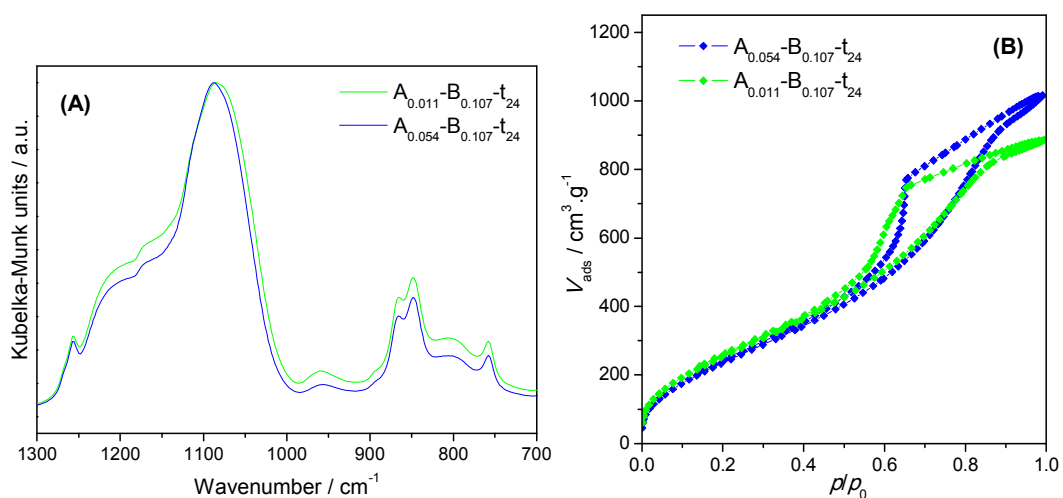

**Figure S4.** (A) DRIFT spectra of hybrid monoliths (series  $A_a-B_{0.107}-t_{24}$ ) in the  $700\text{-}1300\text{ cm}^{-1}$  region, normalized to the  $\nu_{\text{as}}\text{Si-O-Si}$  band (at  $\sim 1090\text{ cm}^{-1}$ ); (B)  $\text{N}_2$  sorption isotherms of samples  $A_a-B_{0.107}-t_{24}$ .

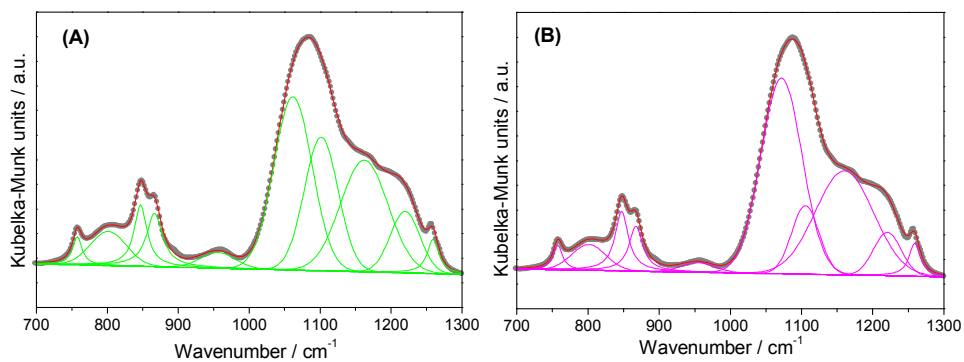

**Figure S5.** Deconvolution of the infrared spectra in the  $700\text{-}1300\text{ cm}^{-1}$  region for samples  $A_{0.011}-B_{0.107}-t_{24}$  (A) and  $A_{0.054}-B_{0.107}-t_{24}$  (B).

**Table S4.** Components obtained by deconvolution of the spectral region between 700 and 1300  $\text{cm}^{-1}$  for the series  $A_a\text{-}B_{0.107\text{-}t_{24}}$ .

| Sample                                     | Series $A_a\text{-}B_{0.107\text{-}t_{24}}$ |                    |                     |                     |                  |                                                     |                                                     |                                                     |                                                     |                     | A[ $\nu\text{Si-OH}$ ] | A[ $\text{CH}_3\text{-related}$ ] |
|--------------------------------------------|---------------------------------------------|--------------------|---------------------|---------------------|------------------|-----------------------------------------------------|-----------------------------------------------------|-----------------------------------------------------|-----------------------------------------------------|---------------------|------------------------|-----------------------------------|
|                                            | $\tilde{\nu} / \text{cm}^{-1}$<br>(Area /%) |                    |                     |                     |                  |                                                     |                                                     |                                                     |                                                     |                     |                        |                                   |
| $A_{0.011}\text{-}B_{0.107\text{-}t_{24}}$ | 757<br>(1.61)                               | 801<br>(5.23)      | 846<br>(4.97)       | 866<br>(5.31)       | 955<br>(2.35)    | 1061<br>(28.44)                                     | 1101<br>(19.27)                                     | 1162<br>(22.64)                                     | 1219<br>(7.78)                                      | 1259<br>(2.39)      | 2.35                   | 11.88                             |
| $A_{0.054}\text{-}B_{0.107\text{-}t_{24}}$ | 757<br>(1.54)                               | 800<br>(4.13)      | 847<br>(5.44)       | 867<br>(4.24)       | 955<br>(1.53)    | 1071<br>(37.84)                                     | 1105<br>(8.84)                                      | 1160<br>(28.38)                                     | 1220<br>(5.64)                                      | 1259<br>(2.43)      | 1.53                   | 11.21                             |
| Assignments                                | $\rho\text{CH}_3$                           | $\nu_s$<br>Si-O-Si | $\gamma\text{CH}_3$ | $\gamma\text{CH}_3$ | $\nu$<br>Si-O(H) | $\nu_{\text{as}}\text{Si-O-Si}$<br>[TO (SiO) $_6$ ] | $\delta\text{CH}_3$ |                        |                                   |
